# Supplementary material for: Mir-494 inhibits osteoblast differentiation by regulating BMP signaling in simulated microgravity
Source: Springer Nature journal article supplement (doi:10.1007/s12020-019-01952-7), 2019-05-25
Supplement: MOESM1 [file 16750760]

**Supplemental Experimental Procedures**

**Clinorotation to simulate microgravity.**

The clinostat is an effective, ground-based tool to simulate microgravity[45](#_ENREF_45),[46](#_ENREF_46). The clinostat consisted of two groups of turntables, one vertical and the other horizontal, to which chambers were afﬁxed during the incubation period. The vertical chambers were rotated around the horizontal axis, which designates clinorotation. Clinorotation mimics certain aspects of the microgravity environment by nullifying the integrated gravitational vector through continuous averaging. The horizontal chambers were rotated around the vertical axis, which designates rotational control. C2C12 cells were exposed to clinorotation for 24 h at 30 rpm. In the present study, cells were seeded at a density of 1×105 cells on 2.5 cm×3.0 cm coverslips which were placed in 6-well plates at 37℃ in 5% CO2. After the cells grew for 24 h and adhered to the coverslips, the coverslips were inserted into the ﬁxture of the chambers which were subsequently ﬁlled completely with DMEM with 10% FBS and aspirated to eliminate the presence of air bubbles. The chambers were divided into three groups: stationary control without rotation, horizontal rotation control and clinorotation. The clinostat is located in an incubator and thermostated at 37℃.

**Tail-suspended Hindlimb Unloading Rat Model.**

Male Sprague-Dawley rats (SIPPR-BK Experimental Animal Ltd.) with the age of 8 weeks were supplied by the Animal Center of the Fourth Military Medical University and treated under the approval by the Institutional Ethics Committee of the Fourth Military Medical University. The technique of tail suspension was described in previous papers1,2 . Brieﬂy, the tail was cleaned and air dried and sprayed with a generous amount of benzoin and resin. A strip of adhesive tape looped over a plastic bar in the middle of the tape was then attached laterally along the proximal portion of the tail and then secured by three tape strips. The tail was divided into four quadrants, and only an opposite pair of quadrants (lateral or dorsoventral) was used for application of the traction tape. Tape was replaced weekly using the alternate pair of quadrants. The rats were attached via the plastic bar in the tape to a ﬁsh swivel mounted at the top of the plexiglas cage. The animals were maintained in -30 degrees head-down-tilt position with their hindlimbs unloaded. All animals received standard rat chow and water ad libitum and were caged individually in a room maintained at 23°C on a 12:12-h light-dark cycle (lights on at 0600). The simulation period lasted 14 to 28 days.

**Imaging by bone scintigraphy.**

99mTechnetium-methylene diphosphonate (99mTc-MDP), a speciﬁc marker of the anabolic phase of remodeling, has been used in the diagnosis of a broad spectrum of pathological conditions affecting the skeleton. To observe bone metabolic activity in the region of the joints and bones, bone scintigraphic images were taken 0, 14 and 28 d after extraction using a gamma camera (ZLC7500; Siemens, Munich, Germany) with a modiﬁed high-resolution pinhole collimator (pinhole diameter:2 mm). This analysis does not require the animal to be killed, and can be repeated. 99mTc-MDP (74 MBq per rat) was injected intravenously via the tail vein of rats. Static-planar acquisition was initiated 2 h after the injection (matrix size 512×512, stop condition 100,000 counts). The scintigrams were translated into a 16-bit tagged image ﬁle format (TIFF) using a data-processing unit (Scintipac 700; Shimazu, Osaka, Japan) and conversion software (picMAO; Shimazu). Images were analyzed using image analysis software (osiris; Geneva University Hospital, Geneva, Switzerland). After identiﬁcation of the joints and bones by overlapping the X-ray images and scintigrams, a round region of interest (ROI) was deﬁned around the extracted side (right) and the intact side (left) of the joints or bones, respectively, and the accumulation of 99mTc-MDP in the regions was measured. The ratio of the metabolic activity around the joint and bone on the extracted side to that on the intact side (uptake ratio) was used.

**Total RNA preparation and reverse transcription.**

Total RNA from cell lines were extracted using Trizol (Invitrogen, USA). Concentration and purity of total RNA were measured using a SmartSpec Plus spectrophotometer (Bio-Rad, CA, USA). The ratio of A260:A280 was used to indicate the purity of total RNA. cDNA was generated using the miScript Reverse Transcription Kit (Qiagen, Hilden, Germany). According to the manufacturer’s instructions, 1 μg total RNA, 1 μL miScript Reverse Transcriptase Mix, 4 μL 5× miScript RT buffer and an appropriate volume RNase-free water were mixed well and incubated for 5 min at 95°C to inactivate the miScript Reverse Transcriptase Mix. All reverse transcriptions and no-template controls were run simultaneously.

**Constructs and luciferase assay.**

The full DNA sequence of RUNX2 and BMPR2 ORF was cloned and inserted into the pCMV vector. For luciferase assay, the 3’-UTR sequences containing putative miR-494 binding sites of the selected 18 genes were cloned into the modified pGL3 reporter plasmid (Promega), downstream of the luciferase coding sequence. Mutations in miR-494 binding site seed residues in the 3’-UTR of RUNX2 and BMPR2 were contrasted by recombinant PCR. Dual luciferase assays were performed as the manufacturer manual. Briefly, HEK293T cells were plated in 48-well plates 24 h before transfection. In each well, 200 ng of reporter plasmids containing wildtype or mutant 3’UTR of putative target genes, together with 10 nM NC, miR-494 mimics, miR-494 inhibitor or negative control were co-transfected using Lipofectamine 2000. 10 ng of the renilla luciferase expressing phRL-TK vector (Promega, Madison, USA) was also co-transfected for normalizing transfection efﬁciency. (Life Technologies, CA, USA). After 48 h, cells were harvested with 100 μL PLB reagent (Promega, Madison, USA), and 20 μL cell lysates were prepared in reporter lysis buffer (Promega). Fireﬂy luciferase activity was measured for each well using the Dual Luciferase Assay Kit (Promega) with an analytical luminometer (TD-20/20, Turner Designs, Sunnyvale, USA) according to the manufacturer’s instruction. Normalized relative luciferase activity (RLA) was calculated using the following formula: RLA = [ﬁreﬂy luciferase activity]/[renilla luciferase activity]. Primer sequences are listed in supplementary table 1.

**Synthetic miR-494 mimics, inhibitor and siRNAs targeting RUNX2 and BMPR2.**

MiR-494 mimics, miR-494 inhibitor, negative control RNA oligonucleotides, and siRNA targeting RUNX2 and BMPR2 were all purchased from Genepharma Corporation (Shanghai, China). siRNA sequences are listed in supplementary table 1.

**Western blot analysis.**

Cells were harvested and the proteins were extracted using RIPA lysis buffer supplemented with a protease inhibitor cocktail (Sigma, USA). Protein samples (30 μg) were resolved by 12% SDS–PAGE and then transferred to nitrocellulose membranes. The membranes were blocked by TBST buffer (TBS plus 0.1% Tween-20) containing 5% w/v non-fat milk and hybridized with primary antibody, followed by incubation with speciﬁc HRP-conjugated secondary antibody. Protein bands were visualized by the ECL detecting system (Pierce, USA). Mouse monoclonal anti-RUNX2 (Abcam, USA), anti-BMPR2 (CST, USA) were used. Monoclonal anti-ACTIN (1:5000, Sigma-Aldrich, USA) was used for the loading control.

**Chromatin immunoprecipitation.**

Chromatin was immunoprecipitated according to the manufacturer’s instructions (Cell Signaling Technology, Danvers, MA). In brief, cells were crosslinked with 1% (vol/vol) formaldehyde. Chromatin was isolated, digested by micrococcal nuclease (MNase), sheared by sonication, and immunoprecipitated with antibodies. Immunoprecipitated DNA was washed and eluted according to the manufacturer’s instructions. Eluted DNA and sheared input material was analyzed by PCR. The following antibodies were used: anti-MyoD rabbit polyclonal and anti-IgG (Santa Cruz Biotechnology,USA). The precipitated DNA was amplified by PCR using primers listed in supplementary table 1.

**Supplementary table 1**

| **Primers for qPCR** | **sequences (5'→3')** |
| --- | --- |
| qALP_F | ccagcaggtttctctcttgg |
| qALP_R | ctgggagtctcatcctgagc |
| qOC_F | cttggtgcacacctagcaga |
| qOC_R | accttattgccctcctgctt |
| qOSX_F | cttgagaggagacgggacag |
| qOSX_R | tgcaggagagaggagtccat |
| qRUNX2_F | cccagccacctttacctaca |
| qRUNX2_R | tatggagtgctgctggtctg |
| qGAPDH_F | aactttggcattgtggaagg |
| qGAPDH_R | acacattgggggtaggaaca |
| **Primers for cloning** | **sequences (5'→3')** |
| pRUNX2_F | atgcgtattcctgtagatccgag |
| pRUNX2_R | caatatggccgccaaacagac |
| p3'UTR_RUNX2_F | aattcgtatctgccattgtgtgtgagtttgagatccagccctccttggaggatgctgca |
| p3'UTR_RUNX2_R | gcatcctccaaggagggctggatctcaaactcacacacaatggcagatacg |
| p3'UTR_RUNX2_mut_F | aattcgtatctgccatacaaagtgagtttgagatccagccctccttggaggatgctgca |
| p3'UTR_RUNX2_mut_R | gcatcctccaaggagggctggatctcaaactcactttgtatggcagatacg |
| p3'UTR_BMPR2_F | aattctaggaatgaattgtctgtgagatgttttcaagcttatggagtgaaattactgca |
| p3'UTR_BMPR2_R | gtaatttcactccataagcttgaaaacatctcacagacaattcattcctag |
| p3'UTR_BMPR2_mut_F | aattctaggaatgaattgtctgtgagtacaaatcaagcttatggagtgaaattactgca |
| p3'UTR_BMPR2_mut_R | gtaatttcactccataagcttgatttgtactcacagacaattcattcctag |
| **siRNA** | **sequences (5'→3')** |
| siRUNX2_F | gguucaacgaucugagauu(dTdT) |
| siRUNX2_R | aaucucagaucguugaacc(dTdT) |
| siBMPR2_F | gggagcacguguuaugguc(dTdT) |
| siBMPR2_R | gaccauaacacgugcuccc(dTdT) |
| **Primers for ChIP** | **sequences (5'→3')** |
| PDR_F | tgctcatacccaggaacctc |
| PDR_R | aactgaaggccaatggtcag |
| A_F | gtatctaatcccgccttg |
| A_R | ctagcacacacatttagtg |
| B_F | atcccttccttgatatgggg |
| B_R | tcacaaccagagagcagtgg |
| C_F | ctttaatcccagcacttg |
| C_R | tggaactcattctgtagac |
| D_F | ctaaacctggagagataaggaatgc |
| D_R | gacagtccacagaattgcctgag |
| E_F | agtaaacaacgccatcctgg |
| E_R | gagcaagaacaacgaagcct |

**References**

1. Wronski TJ, Morey-Holton ER. Skeletal response to simulated weightlessness: a comparison of suspension techniques. Aviat Space Environ Med. 1987;58(1):63-68.

2. Morey-Holton ER, Globus RK. Hindlimb unloading rodent model: technical aspects. J Appl Physiol (1985). 2002;92(4):1367-1377.

**Supplementary Figures**

**
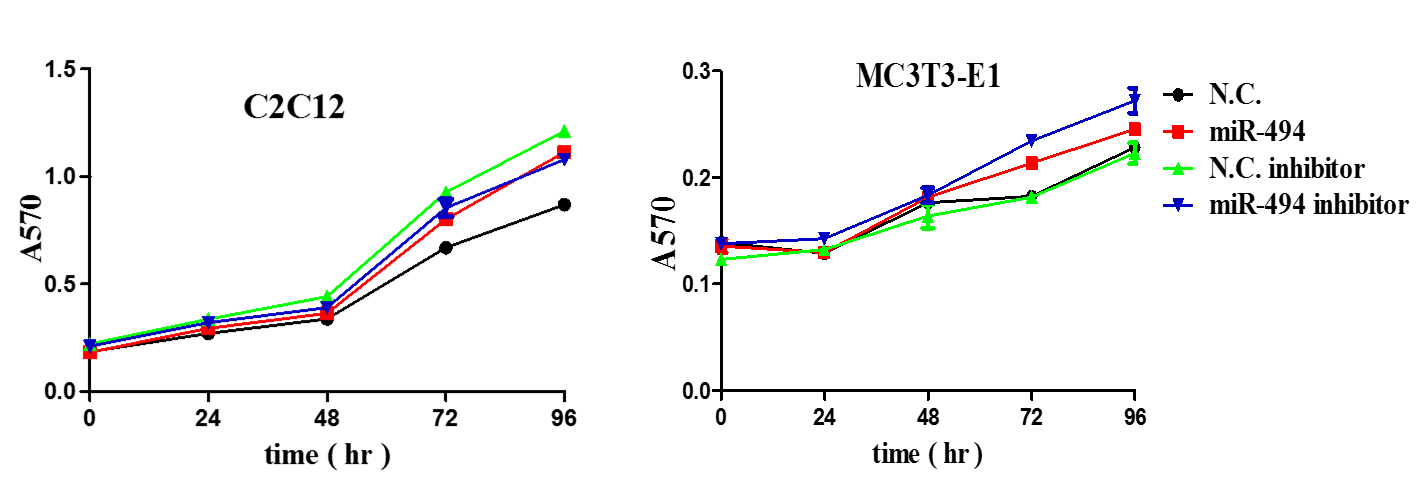
**

**Figure S1.** The effect of miR-494 on cell proliferation. C2C12 cells (a) and MC3T3-E1 cells (b) were transfected with negative control (NC), miR-494 mimics, NC inhibitor or miR-494 inhibitor at a final concentration of 100nM and were subjected to MTT assays. Data are representative of three independent experiments.

**
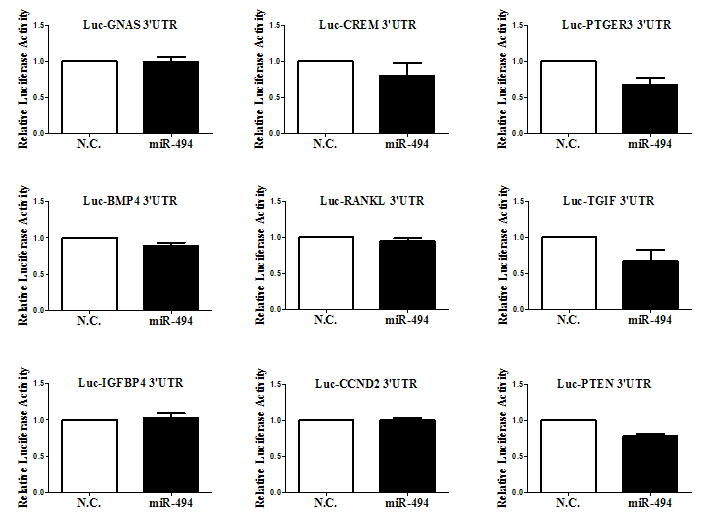
**

**
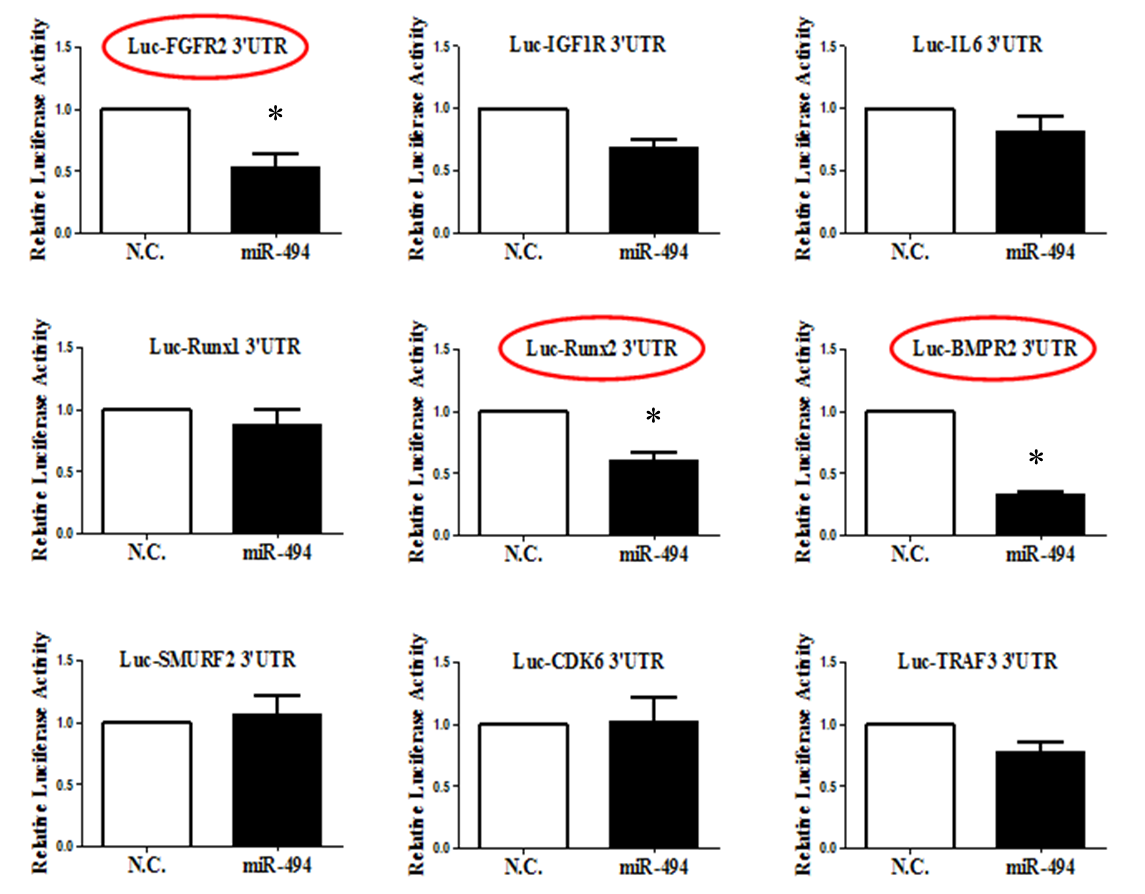
**

**Figure S2.** Reporter assay for identifying the targets of miR-494. 3’-UTR sequences containing putative miR-494 binding sites of the selected 18 genes were cloned into a pGL3-based luciferase reporter vector and were cotransfected with miR-494 or NC into 293A cells. Luciferase activities were measured 48 h after transfection. Data are represented as the mean±SD and representative of three independent experiments. *p< 0.05.
